# Supplementary material for: Prescribing of Antidiabetic Medicines before, during and after Pregnancy: A Study in Seven European Regions
Source: PubMed Central journal article supplement (PMC4871589; doi:10.1371/journal.pone.0155737), 2016-05-18

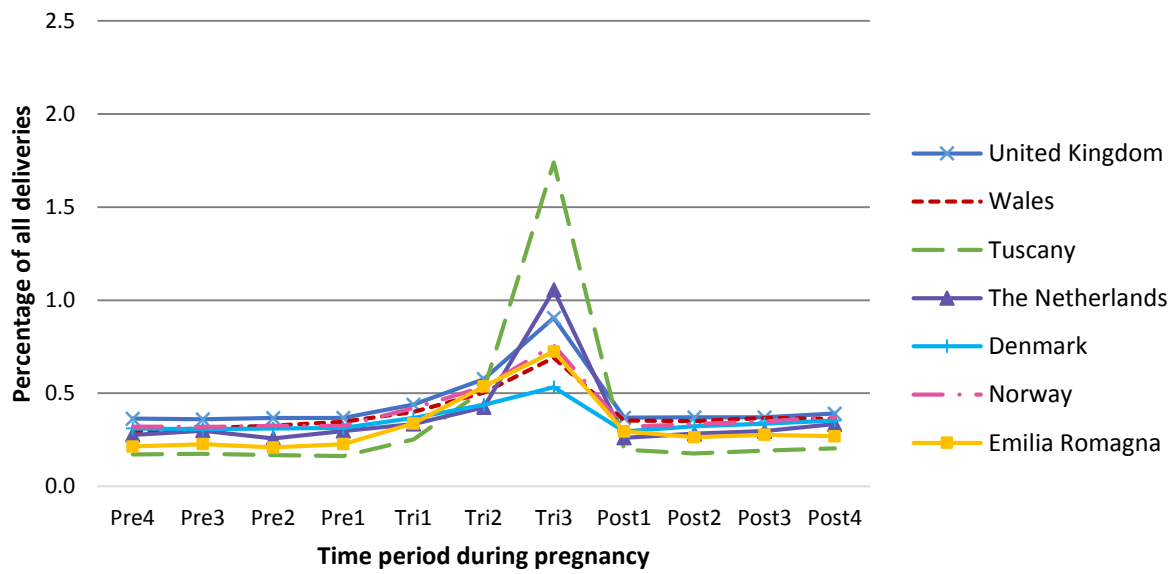

Supplement: pone.0155737.s001.pdf [file pone.0155737.s001.pdf]
